# Supplementary material
Source: Springer Nature journal article supplement (https://www.springermedizin.de/resource/supplementary/12885_2011_2868_MOESM3_ESM.pdf/9462080)

**(A)**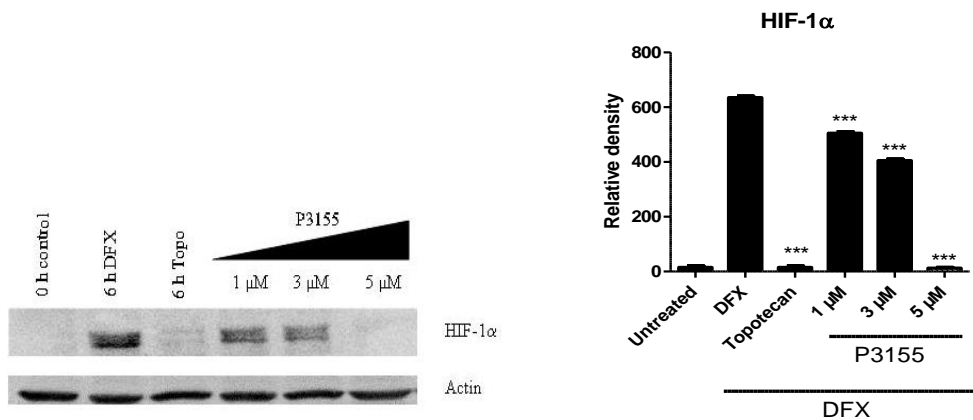**(B)**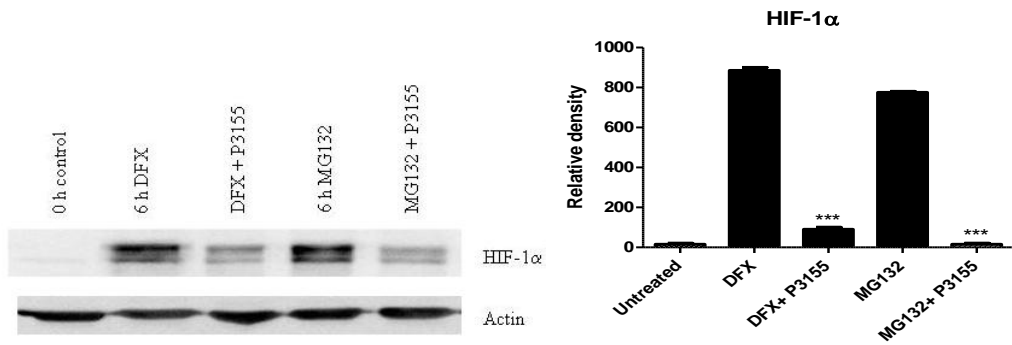

Supplement: MOESM3 [file 9462080]
